# Supplementary material
Source: publisher figshare collection journal article supplement (https://acs.figshare.com/ndownloader/files/4305223)
Supplement: Supplementary file 1 [file 4305223]

# Supporting Information

## Dithienothiophene (DTT)-based Dyes for Dye-Sensitized Solar Cells:

### Synthesis of 2,6-Dibromo-DTT

*Tae-Hyuk Kwon,<sup>†</sup> Vanessa Armel,<sup>‡</sup> Andrew Nattestad,<sup>‡</sup> Douglas R. MacFarlane,<sup>\*,‡</sup> Udo*

*Bach,<sup>\*,‡</sup> Samuel J. Lind,<sup>§</sup> Keith C. Gordon,<sup>§</sup> Weihua Tang,<sup>†</sup> David J. Jones,<sup>†</sup> and*

*Andrew B. Holmes<sup>\*,†</sup>*

<sup>†</sup>School of Chemistry, Bio21 Institute, University of Melbourne, Parkville, Vic 3010, Australia, <sup>‡</sup>ARC Centre of Excellence for Electromaterials Science, Monash University, Clayton, Vic 3800, Australia, and <sup>§</sup>MacDiarmid Institute for Advanced Materials and Nanotechnology, Department of Chemistry, University of Otago, Dunedin, New Zealand.

### List of Contents

|                             |            |
|-----------------------------|------------|
| <b>Solar Cells Assembly</b> | <b>S1</b>  |
| <b>Device Results</b>       | <b>S4</b>  |
| <b>NMR</b>                  | <b>S5</b>  |
| <b>DFT Calculations</b>     | <b>S11</b> |

### Solar Cells Assembly

Working electrodes were screen printed on clean 4 mm NSG F:SnO<sub>2</sub> glass (13 ohm/square, Nippon Sheet Glass, Japan), using TiO<sub>2</sub> paste (PST-18NR, JGC- Catalysts and Chemicals Ltd., Japan). A homemade scattering paste (see later) was applied on the transparent film. Films were dried at 125 °C before subsequent prints were applied.

A full sinter followed:

|                  | Step1 | Step2 | Step3 | Step4 | Step5 |
|------------------|-------|-------|-------|-------|-------|
| Ramp (°/min)     | 10    | 15    | 5     | 7     | 5     |
| Temperature (°C) | 150   | 325   | 375   | 450   | 500   |
| Duration (min)   | 10    | 5     | 5     | 30    | 15    |

Prior to device construction, the electrode was re-sintered at 500 °C for 30 minutes in air. After the electrode was allowed to cool around 80 °C, it was immersed in a dye solution containing organic dye **13** (0.2 mM) with or without 3 $\alpha$ , 7 $\alpha$ -dihydroxy-5 $\beta$ -cholic acid (10 mM) in CHCl<sub>3</sub>/EtOH (1:1) and maintained in darkness at room temperature for 12 h. The electrode was then rinsed with EtOH and dried.

Counter electrodes were prepared by drilling a hole to be used as a filling port in a piece of 3 mm NSG F:SnO<sub>2</sub> glass (13 ohm/square), before applying one drop of a solution of H<sub>2</sub>PtCl<sub>6</sub> in 2-propanol (10 mM) with a pipette. The drop was smeared over the full surface and allowed to dry. This glass was then fired at about 400 °C for 15 minutes using a heat gun.

The working and counter electrodes were sandwiched with 25  $\mu$ m Surlyn (Solaronix, Switzerland) and sealed using a pneumatic finger and resistive heater (150 °C) for 26 s. The electrolyte [0.6 M 1,2-dimethyl-3-propylimidazolium iodide,<sup>1</sup> 0.025 M LiI, 0.04 M I<sub>2</sub>, 0.05 M guanidinium thiocyanate (GuSCN), and 0.28 M *tert*-butylpyridine (TBP) in the mixture of dry acetonitrile and valeronitrile (v/v = 85/ 15)] was introduced into the

cavity through pre-drilled holes in the counter electrode by vacuum backfilling. The filling port was sealed using 25  $\mu\text{m}$  Surlyn and a microscope coverslip. Electrode contact was achieved using Cerasol CS186 solder at 220  $^{\circ}\text{C}$  with an oscillation frequency of 60 kHz prior to attaching copper wires using standard 60–40 tin–lead solder.

Solar cells were tested using simulated sunlight (AM 1.5, 1000  $\text{W}/\text{m}^2$ ) provided by an Oriel solar simulator with an AM 1.5 filter. Current-voltage characteristics were measured using a Keithley 2400 source meter. Cells were biased from high to low, with 10 mV steps and 40 ms settling time.

Incident photon to charge carrier conversion efficiency (IPCE) was conducted with the cell held under short circuit conditions and illuminated by monochromatic light. A cornerstone 260 monochromator was used in conjunction with an optical fibre, Keithly 2400 source meter and 150W Oriel Xe lamp.

#### **Fabrication of Scattering Paste**

The scattering paste was produced by completing a solvent exchange of water for ethanol with commercial 400 nm and 18 nm titania sols (HPW-400C and HPW-18NR, JGC- Catalysts and Chemicals Ltd., Japan). These are mixed together with ethanolic ethyl cellulose solution (10 wt %) and terpineol with a weight ratio of 5:1:35:30. The ethanol is then removed by rotary evaporation.

#### **Synthesis of 1,2-dimethyl-3-propylimidazolium iodide**

1,2-Dimethyl-3-propylimidazolium iodide was synthesized according to literature method.<sup>1</sup>

**Summary of device results using different solvents to adsorb the dye 13 on titania.**

A dye solution (0.2 mM) was made up in various solvents. The device results were obtained using sandwich cells with a standard electrolyte composed of 0.6 M 1,2-dimethyl-3-propylimidazolium iodide, 0.025 M lithium iodide, 0.04 M iodine, 0.05 M guanidinium thiocyanate (GuSCN), and 0.28 M *tert*-butylpyridine (TBP) in dry acetonitrile and valeronitrile (v/v = 85/15) with combination of the 12  $\mu\text{m}$  + 6  $\mu\text{m}$  scattering layer (12 + 6s) without a coadsorbent.

**1) CH<sub>3</sub>CN/CHCl<sub>3</sub> (1:1)**

| Light Intensity                   | <b>38.5 % sun</b> | <b>68.0 % sun</b> | <b>100.0 % sun</b> |
|-----------------------------------|-------------------|-------------------|--------------------|
| Voltage o/c (mV)                  | 614.89            | 633.53            | 646.35             |
| Current s/c (mA/cm <sup>2</sup> ) | 3.26              | 6.06              | 9.2                |
| Fill Factor                       | 0.75              | 0.72              | 0.70               |
| Efficiency (%)                    | 3.89              | 4.07              | 4.15               |

**2) Dichloroethane**

| Light Intensity                   | <b>38.5 % sun</b> | <b>68.0 % sun</b> | <b>100.0 % sun</b> |
|-----------------------------------|-------------------|-------------------|--------------------|
| Voltage o/c (mV)                  | 657.66            | 673.96            | 683.22             |
| Current s/c (mA/cm <sup>2</sup> ) | 3.48              | 6.37              | 9.33               |
| Fill Factor                       | 0.74              | 0.73              | 0.72               |
| Efficiency (%)                    | 4.41              | 4.61              | 4.57               |

**3) CH<sub>2</sub>Cl<sub>2</sub>**

| Light Intensity                   | <b>38.5 % sun</b> | <b>68.0 % sun</b> | <b>100.0 % sun</b> |
|-----------------------------------|-------------------|-------------------|--------------------|
| Voltage o/c (mV)                  | 649.24            | 667.87            | 678.82             |
| Current s/c (mA/cm <sup>2</sup> ) | 3.53              | 6.43              | 9.21               |
| Fill Factor                       | 0.66              | 0.65              | 0.63               |

|                |      |      |      |
|----------------|------|------|------|
| Efficiency (%) | 3.95 | 4.08 | 3.97 |
|----------------|------|------|------|

4) MeOH/CHCl<sub>3</sub>(1:1)

|                                      |                   |                   |                    |
|--------------------------------------|-------------------|-------------------|--------------------|
| Light Intensity                      | <b>38.5 % sun</b> | <b>68.0 % sun</b> | <b>100.0 % sun</b> |
| Voltage o/c (mV)                     | 657.49            | 673.27            | 682.55             |
| Current s/c<br>(mA/cm <sup>2</sup> ) | 4.17              | 7.44              | 10.54              |
| Fill Factor                          | 0.74              | 0.72              | 0.7                |
| Efficiency (%)                       | 5.24              | 5.28              | 5.04               |

5) THF/CHCl<sub>3</sub> (1:1)

|                                      |                   |                   |                    |
|--------------------------------------|-------------------|-------------------|--------------------|
| Light Intensity                      | <b>38.5 % sun</b> | <b>68.0 % sun</b> | <b>100.0 % sun</b> |
| Voltage o/c (mV)                     | 628.97            | 648.38            | 660.83             |
| Current s/c<br>(mA/cm <sup>2</sup> ) | 3.48              | 6.38              | 9.4                |
| Fill Factor                          | 0.73              | 0.71              | 0.7                |
| Efficiency (%)                       | 4.16              | 4.34              | 4.32               |

6) CHCl<sub>3</sub>

|                                      |                   |                   |                    |
|--------------------------------------|-------------------|-------------------|--------------------|
| Light Intensity                      | <b>38.5 % sun</b> | <b>68.0 % sun</b> | <b>100.0 % sun</b> |
| Voltage o/c (mV)                     | 667.03            | 684.77            | 695.77             |
| Current s/c<br>(mA/cm <sup>2</sup> ) | 3.72              | 6.84              | 10.02              |
| Fill Factor                          | 0.76              | 0.75              | 0.75               |
| Efficiency (%)                       | 4.92              | 5.18              | 5.2                |

7) Chlorobenzene

|                                      |                   |                   |                    |
|--------------------------------------|-------------------|-------------------|--------------------|
| Light Intensity                      | <b>38.5 % sun</b> | <b>68.0 % sun</b> | <b>100.0 % sun</b> |
| Voltage o/c (mV)                     | 655.52            | 674.1             | 685.77             |
| Current s/c<br>(mA/cm <sup>2</sup> ) | 3.69              | 6.8               | 9.96               |
| Fill Factor                          | 0.75              | 0.73              | 0.72               |
| Efficiency (%)                       | 4.69              | 4.94              | 4.93               |

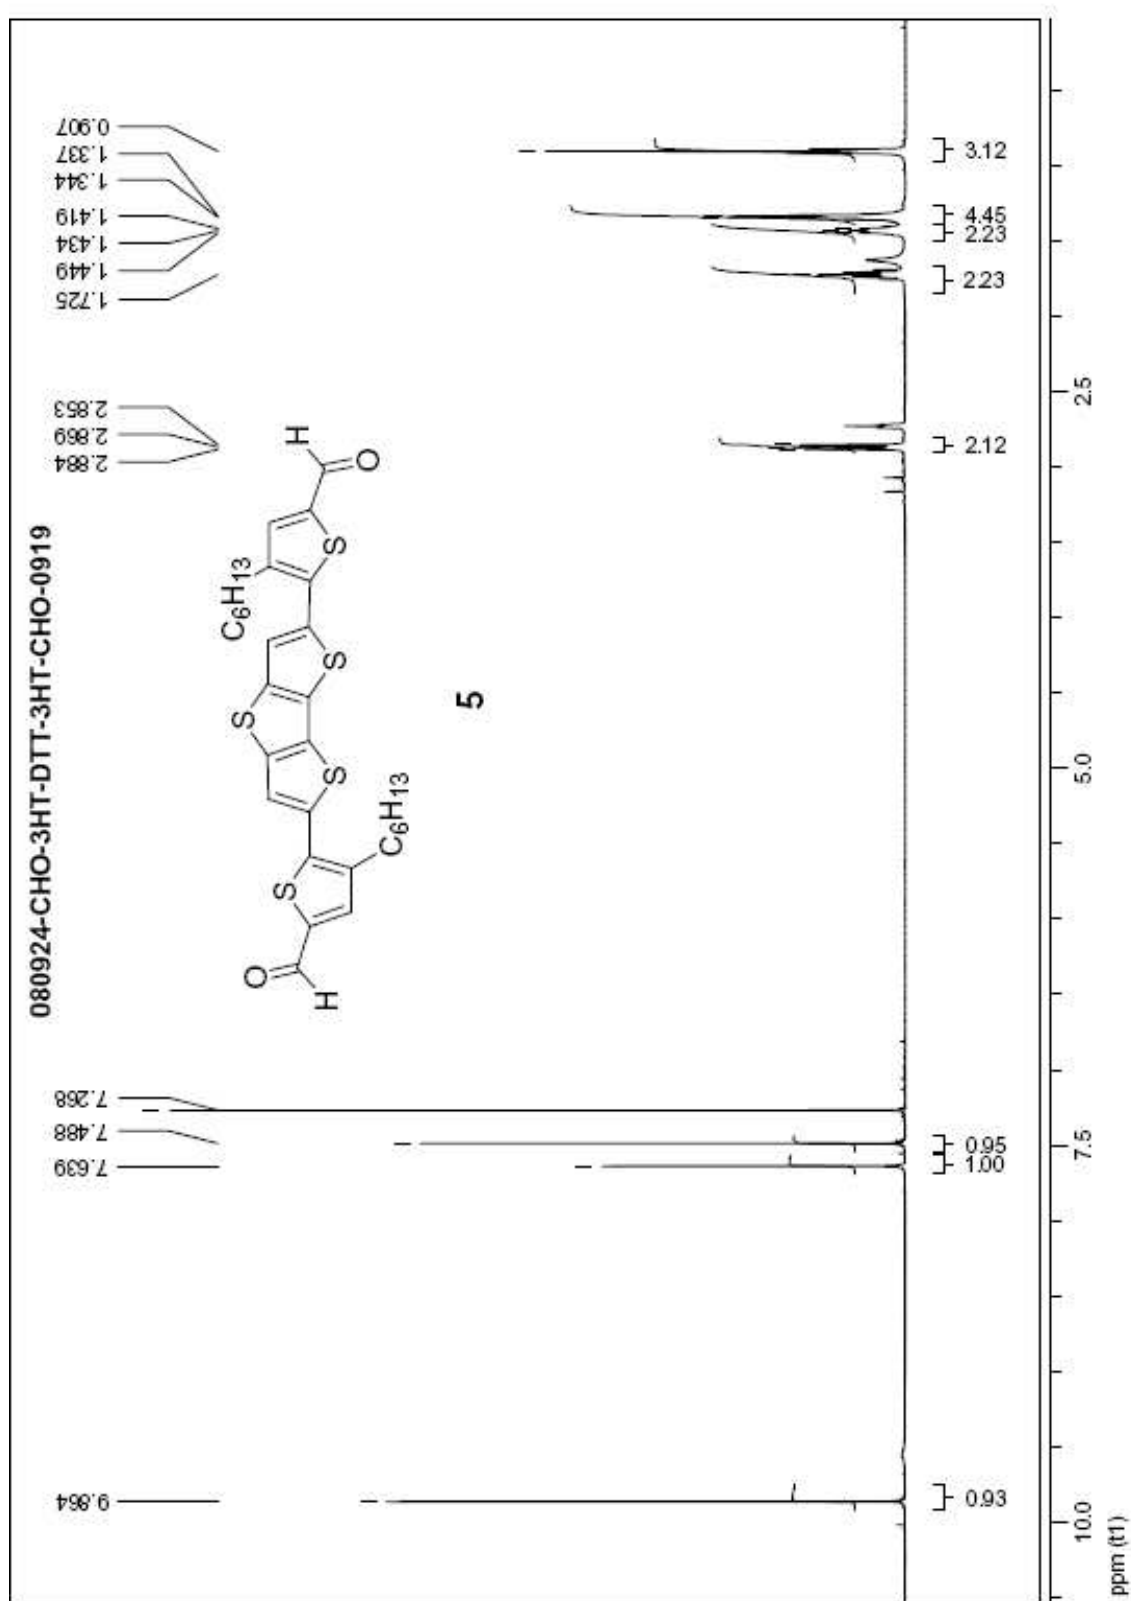

Figure S1. <sup>1</sup>H NMR spectrum of **10** (500 MHz, CDCl<sub>3</sub>).

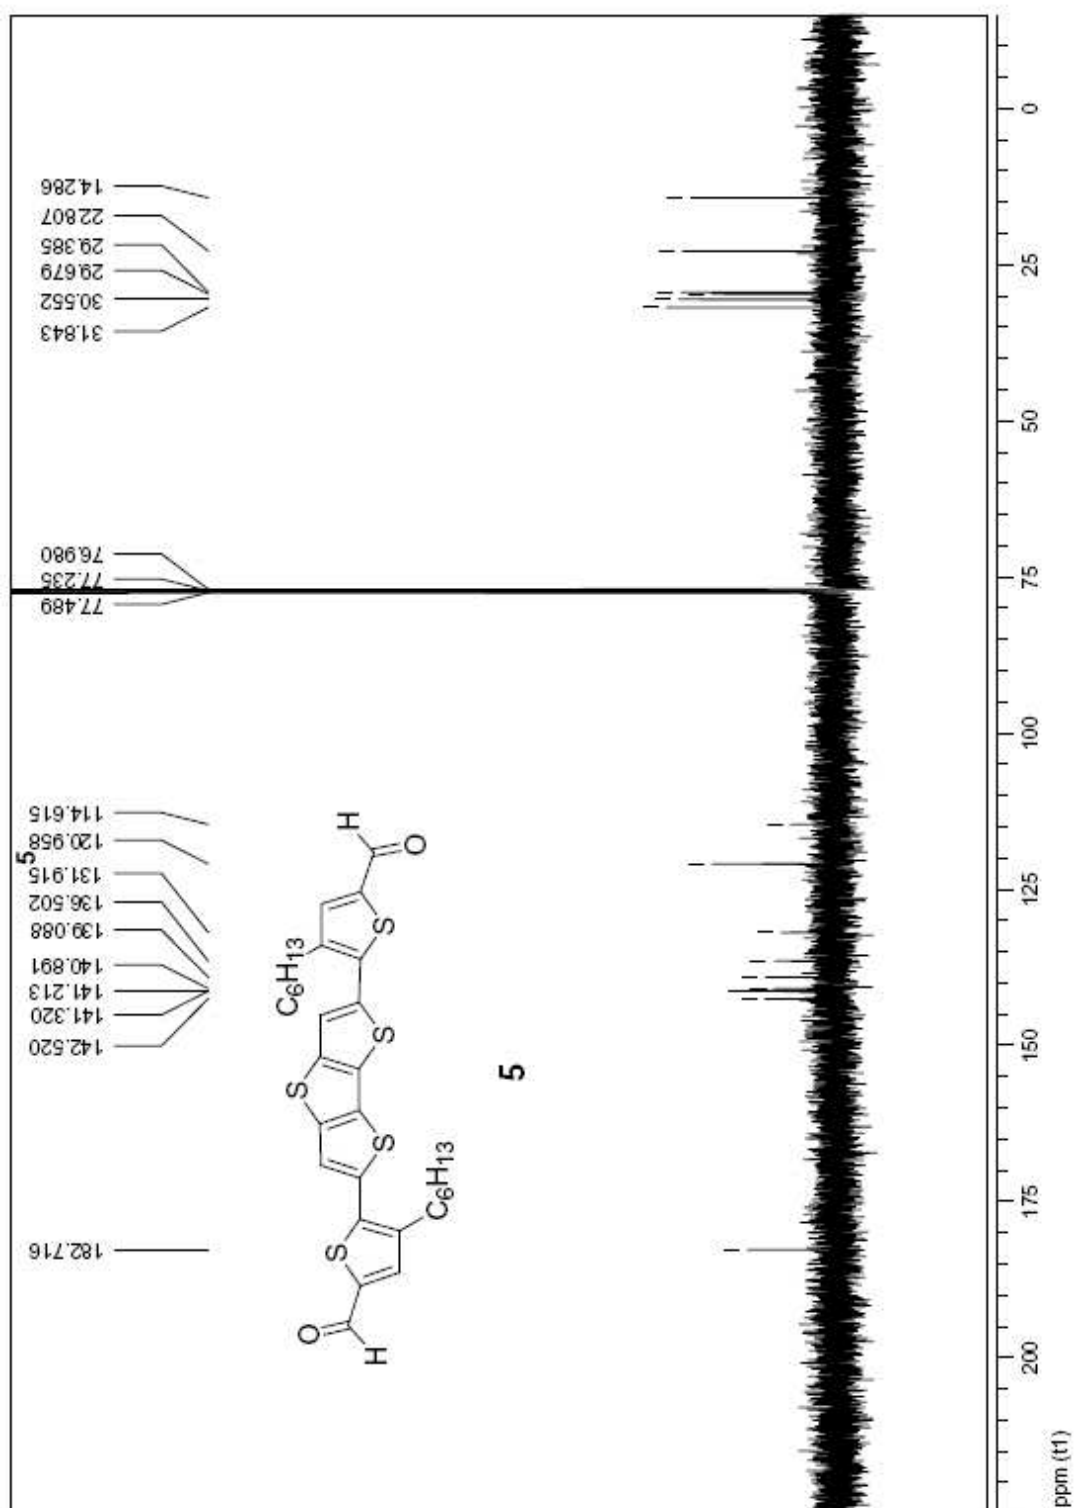

Figure S2. <sup>13</sup>C NMR spectrum of **10** (125 MHz, CDCl<sub>3</sub>).

S7



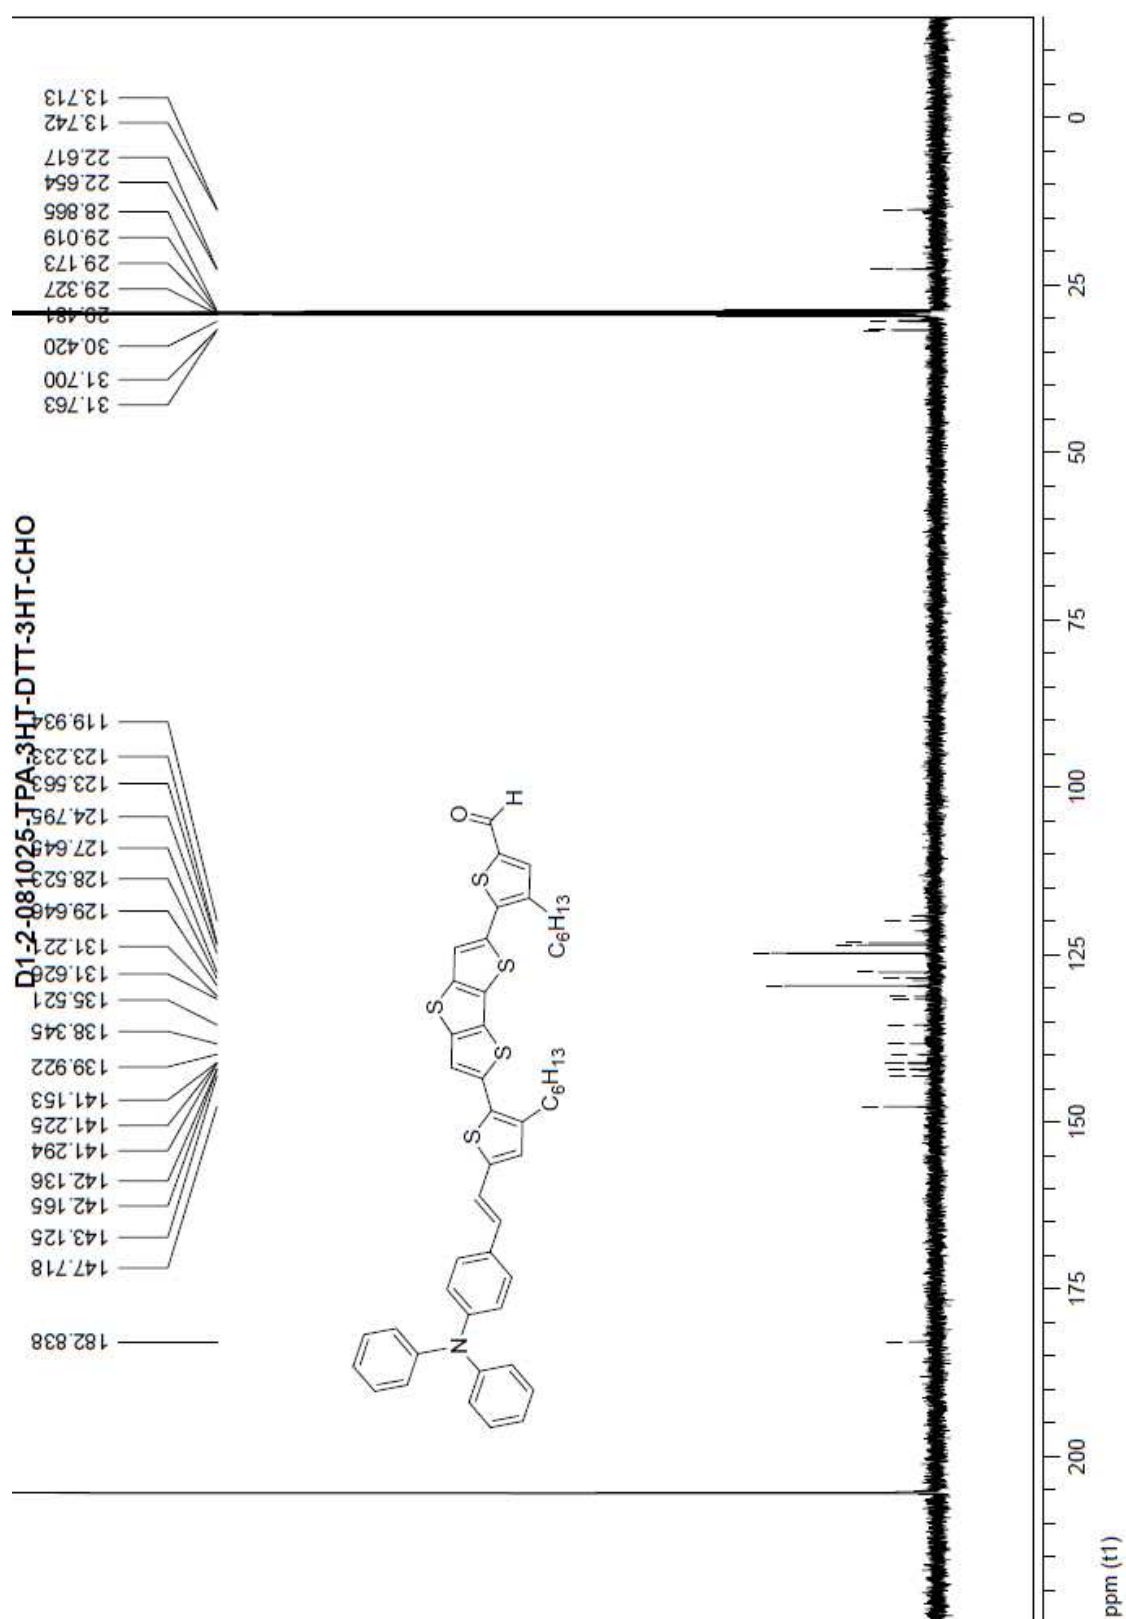

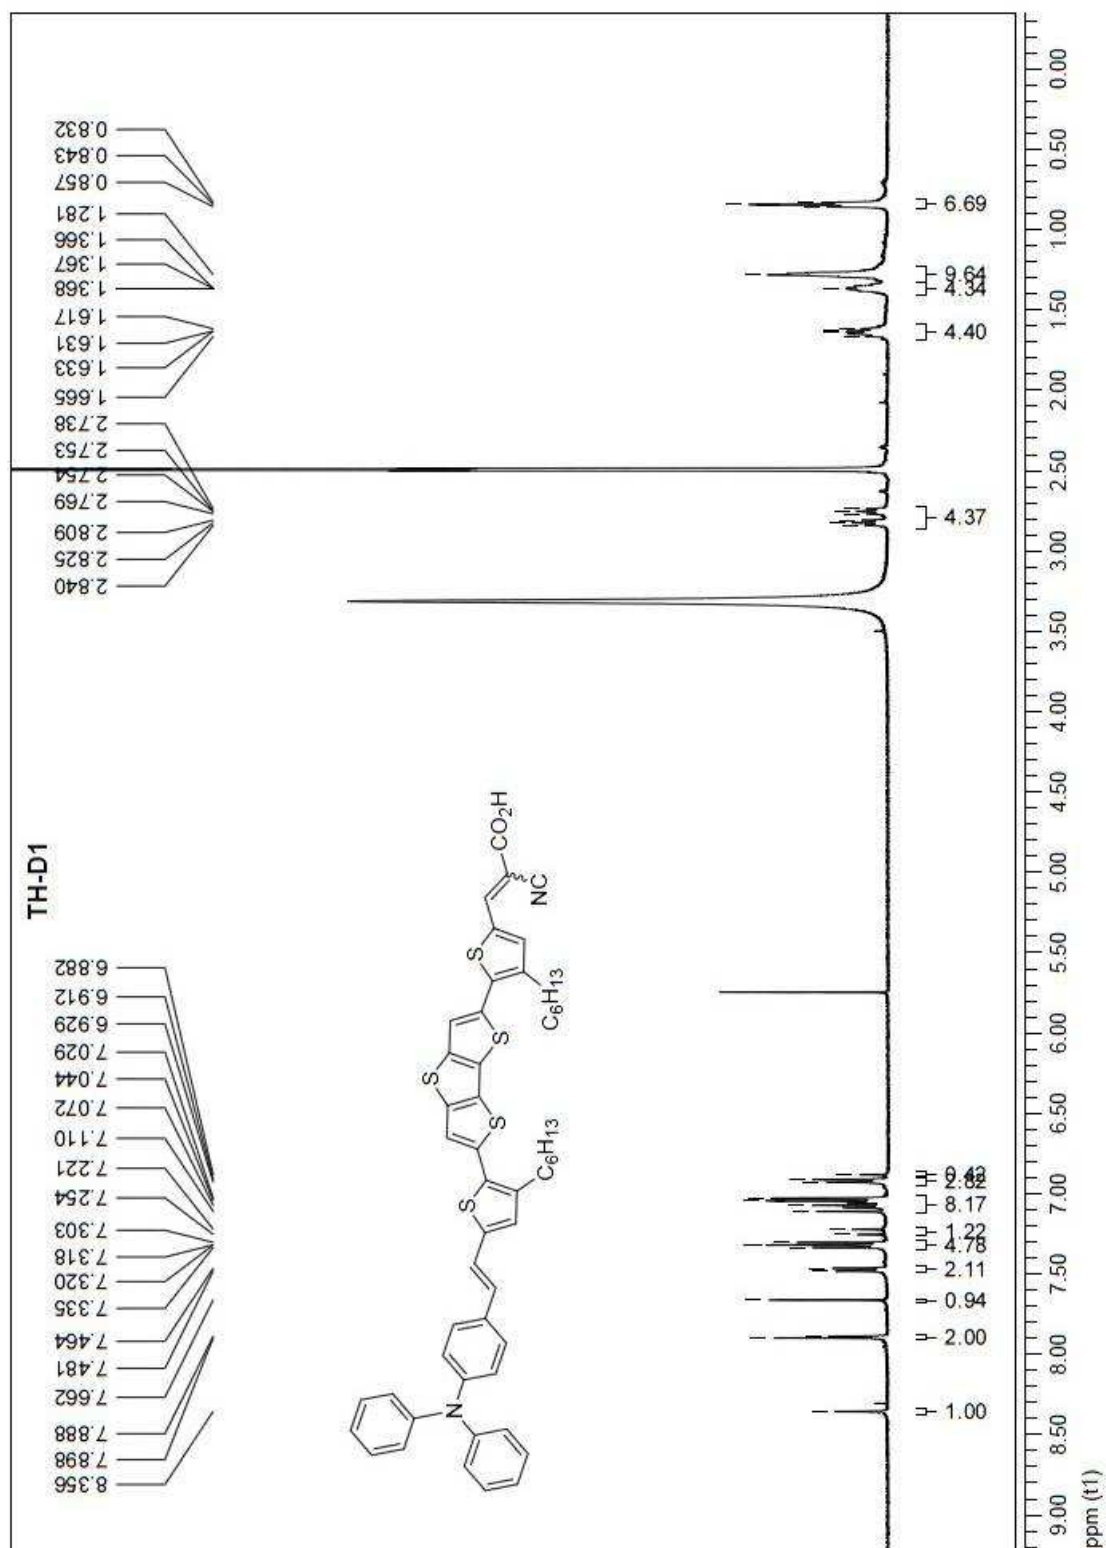

Figure S5. <sup>1</sup>H NMR spectrum of **13** (500 MHz, DMSO- *d*<sub>6</sub>).

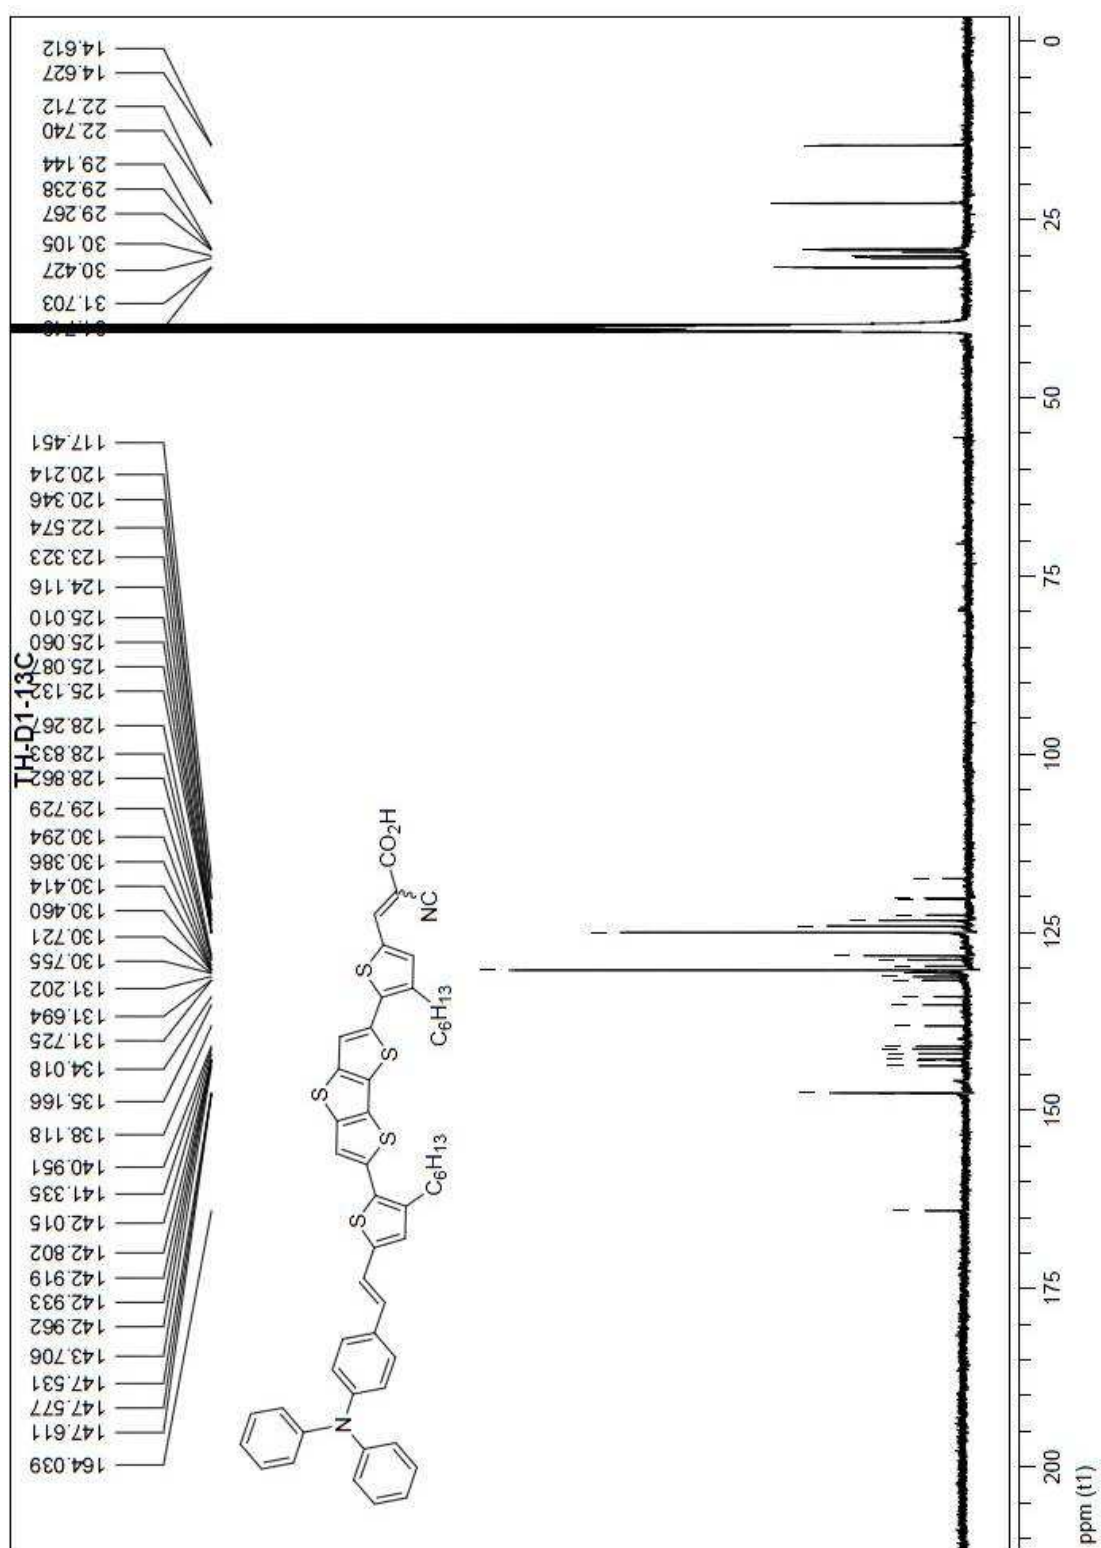

Figure S6. <sup>13</sup>C NMR spectrum of **13** (125 MHz, DMSO-*d*<sub>6</sub>)

**TABLE 1. Observed and Calculated (DFT) Absorption Maxima and Orbital Contributions to Optical Transitions for the Organic Donor Acceptor Dye 13**

|           | Abs / cm <sup>-1</sup><br>( $\epsilon$ / $\times 10^4$ L mol <sup>-1</sup> cm <sup>-1</sup> ) | Calculated<br>Abs / cm <sup>-1</sup><br>(Oscillator<br>strength $f$ ) | Calculated Orbital Contributions                                                                     |
|-----------|-----------------------------------------------------------------------------------------------|-----------------------------------------------------------------------|------------------------------------------------------------------------------------------------------|
| <b>13</b> | 20 450 (3.0)                                                                                  | 19 549 (2.62)                                                         | H-1 $\rightarrow$ L (-0.26), H $\rightarrow$ L (0.51), H $\rightarrow$ L+1 (-0.12) [87% L, 13% L+1]  |
|           | 23 641 (3.0)                                                                                  | 24 513 (0.41)                                                         | H-2 $\rightarrow$ L (0.14), H-1 $\rightarrow$ L (-0.18), H $\rightarrow$ L+1 (0.56) [36% L, 64% L+1] |

\*H = HOMO, HOMO-1 = H-1, HOMO-2 = H-2, L = LUMO, LUMO+1 = L+1

**TABLE 2. DFT-calculated HOMO and LUMO energy levels *in vacuo* and with a contribution from the dichloromethane solvent environment as well as calculated difference between onset oxidation potential  $E_{ox}$  and the  $E_{0-0}$  transition energy for 13**

|           | HOMO vs $V_{ac}$<br>(CH <sub>2</sub> Cl <sub>2</sub> ) / eV | LUMO vs $V_{ac}$<br>(CH <sub>2</sub> Cl <sub>2</sub> ) / eV | LUMO+1 vs $V_{ac}$<br>(CH <sub>2</sub> Cl <sub>2</sub> ) / eV | $E_{ox}-E_{0-0}$ vs $V_{ac}$ [Calc] /<br>eV |
|-----------|-------------------------------------------------------------|-------------------------------------------------------------|---------------------------------------------------------------|---------------------------------------------|
| <b>13</b> | -4.67 (-5.94)                                               | -2.75 (-1.90)                                               | -1.92 (-0.97)                                                 | -3.51                                       |

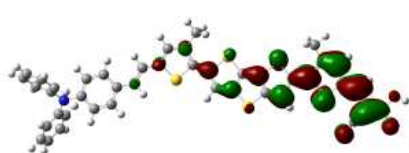

LUMO

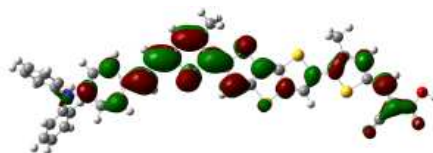

LUMO+1

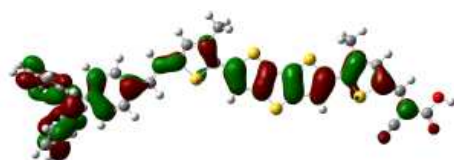

HOMO-1

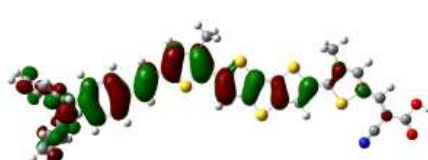

HOMO

A DFT calculation of the dye **13** was carried out at the B3-LYP level of theory with a 6-31G(d) basis set on all atoms using Gaussian09W.<sup>2</sup> A polarizable continuum model was utilized to accurately account for the solvent environment (calculated with CH<sub>2</sub>Cl<sub>2</sub> as a

solvent). The calculated orbital levels are in good agreement with those determined from cyclic voltammetry and approximated in conjunction with emission spectroscopy. The calculated values that include a contribution from the solvent environment match those determined experimentally much better than those calculated *in vacuo*.

**TABLE 3. DFT-calculated atom coordinates for 13<sup>a</sup>.**

| Center | Atomic<br>Number | (Angstroms) |          |          |
|--------|------------------|-------------|----------|----------|
|        |                  | X           | Y        | Z        |
| 1      | S                | 1.835364    | -0.20844 | 1.718276 |
| 2      | S                | -1.57135    | -1.8727  | -0.1371  |
| 3      | S                | -0.99337    | 1.993798 | -0.50753 |
| 4      | C                | 0.429332    | -2.73159 | 1.316993 |
| 5      | H                | 1.088782    | -3.37398 | 1.888629 |
| 6      | C                | -0.71205    | -3.19876 | 0.683683 |
| 7      | C                | 1.21538     | 2.491967 | 0.808981 |
| 8      | H                | 2.05411     | 3.008189 | 1.262242 |
| 9      | C                | 0.241055    | 3.143886 | 0.0657   |
| 10     | C                | -0.17281    | 0.67103  | 0.260753 |
| 11     | C                | -0.38023    | -0.72114 | 0.391845 |
| 12     | C                | 0.614776    | -1.34253 | 1.150084 |
| 13     | C                | 0.983228    | 1.107575 | 0.916746 |
| 14     | C                | 0.197716    | 4.547707 | -0.25865 |
| 15     | C                | -0.82694    | 5.321808 | -0.82038 |
| 16     | S                | 1.620444    | 5.51792  | 0.080295 |
| 17     | C                | -0.4458     | 6.670771 | -0.94618 |
| 18     | C                | 0.837581    | 6.974786 | -0.50612 |
| 19     | C                | -1.17573    | -4.56395 | 0.620866 |
| 20     | C                | -2.40836    | -5.09698 | 0.255332 |
| 21     | S                | -0.05348    | -5.8473  | 1.077157 |
| 22     | C                | -2.43118    | -6.51152 | 0.364372 |
| 23     | C                | -1.25605    | -7.09138 | 0.800908 |
| 24     | H                | -3.31225    | -7.10167 | 0.13058  |
| 25     | C                | -3.61382    | -4.31299 | -0.19541 |
| 26     | H                | -3.8469     | -3.48748 | 0.486465 |

|    |   |          |          |          |
|----|---|----------|----------|----------|
| 27 | H | -3.47331 | -3.88067 | -1.19437 |
| 28 | H | -4.49188 | -4.96419 | -0.24319 |
| 29 | C | -2.18727 | 4.827398 | -1.23873 |
| 30 | H | -2.1316  | 4.146383 | -2.09694 |
| 31 | H | -2.69674 | 4.292075 | -0.42949 |
| 32 | H | -2.82127 | 5.669892 | -1.53084 |
| 33 | H | -1.10595 | 7.432449 | -1.35063 |
| 34 | C | -1.01603 | -8.49725 | 1.003519 |
| 35 | H | -1.86936 | -9.12724 | 0.757531 |
| 36 | C | 0.128816 | -9.0635  | 1.456185 |
| 37 | H | 0.961746 | -8.40573 | 1.706428 |
| 38 | C | 0.392414 | -10.4809 | 1.662641 |
| 39 | C | 1.63428  | -10.8795 | 2.195615 |
| 40 | C | -0.52869 | -11.5053 | 1.357664 |
| 41 | C | 1.942054 | -12.2135 | 2.427471 |
| 42 | H | 2.36845  | -10.1182 | 2.44936  |
| 43 | C | -0.22778 | -12.8408 | 1.572666 |
| 44 | H | -1.49367 | -11.2564 | 0.925564 |
| 45 | C | 1.014354 | -13.2233 | 2.117965 |
| 46 | H | 2.90316  | -12.4809 | 2.853817 |
| 47 | H | -0.95292 | -13.6049 | 1.312607 |
| 48 | N | 1.316168 | -14.5854 | 2.341584 |
| 49 | C | 2.64219  | -15.0709 | 2.154011 |
| 50 | C | 3.219247 | -15.9382 | 3.094522 |
| 51 | C | 3.385104 | -14.6984 | 1.022606 |
| 52 | C | 4.510219 | -16.4261 | 2.900126 |
| 53 | H | 2.650608 | -16.2262 | 3.973029 |
| 54 | C | 4.682013 | -15.1769 | 0.846068 |
| 55 | H | 2.94076  | -14.0353 | 0.286934 |
| 56 | C | 5.251366 | -16.0461 | 1.779356 |
| 57 | H | 4.942413 | -17.097  | 3.637924 |
| 58 | H | 5.243824 | -14.879  | -0.03533 |
| 59 | H | 6.259818 | -16.4228 | 1.63447  |
| 60 | C | 0.300688 | -15.4846 | 2.77653  |
| 61 | C | 0.191189 | -16.7606 | 2.202121 |
| 62 | C | -0.59683 | -15.1122 | 3.789599 |

|    |   |          |          |          |
|----|---|----------|----------|----------|
| 63 | C | -0.79282 | -17.6452 | 2.639665 |
| 64 | H | 0.880755 | -17.0515 | 1.416    |
| 65 | C | -1.58904 | -15.9971 | 4.2081   |
| 66 | H | -0.51026 | -14.1304 | 4.244348 |
| 67 | C | -1.69133 | -17.2689 | 3.640394 |
| 68 | H | -0.86419 | -18.6297 | 2.184781 |
| 69 | H | -2.27586 | -15.6938 | 4.993949 |
| 70 | H | -2.46118 | -17.9586 | 3.974363 |
| 71 | C | 1.398971 | 8.282401 | -0.54489 |
| 72 | H | 0.734682 | 9.033478 | -0.96397 |
| 73 | C | 2.627018 | 8.742709 | -0.14372 |
| 74 | C | 3.00789  | 10.16742 | -0.27835 |
| 75 | O | 4.076354 | 10.63238 | 0.059461 |
| 76 | O | 2.023466 | 10.92949 | -0.83054 |
| 77 | H | 2.387577 | 11.83282 | -0.86574 |
| 78 | C | 3.622988 | 7.897343 | 0.429893 |
| 79 | N | 4.416802 | 7.183543 | 0.895669 |

<sup>a</sup>Ground state energy = -3868.1992993 Hartrees

## References.

1. P. Bonhote, A. P. Dias, N. Papageorgiou, K. Kalyanasundaram and M. Grätzel, *Inorg. Chem.*, 1996, **35**, 1168-1178.
2. M. J. Frisch, G. W. Trucks, H. B. Schlegel, G. E. Scuseria, M. A. Robb, J. R. Cheeseman, J. A. Jr. Montgomery, T. Vreven, K. N. Kudin, J. C. Burant, J. M. Millam, S. S. Iyengar, J. Tomasi, V. Barone, B. Mennucci, M. Cossi, G. Scalmani, N. Rega, G. A. Petersson, H. Nakatsuji, M. Hada, M. Ehara, K. Toyota, R. Fukuda, J. Hasegawa, M. Ishida, T. Nakajima, Y. Honda, O. Kitao, H. Nakai, M. Klene, X. Li, J. E. Knox, H. P. Hratchian, J. B. Cross, C. Adamo, J. Jaramillo, R. Gomperts, R. E. Stratmann, O. Yazyev, A. J. Austin, R. Cammi, C. Pomelli, J. W. Ochterski, P. Y. Ayala, K. Morokuma, G. A. Voth, P. Salvador, J. J. Dannenberg, V. G. Zakrzewski, S. Dapprich, A. D. Daniels,

M. C. Strain, O. Farkas, D. K. Malick, A. D. Rabuck, K. Raghavachari, J. B. Foresman, J. V. Ortiz, Q. Cui, A. G. Baboul, S. Clifford, J. Cioslowski, B. B. Stefanov, G. Liu, A. Liashenko, P. Piskorz, I. Komaromi, R. L. Martin, D. J. Fox, T. Keith, M. A. Al-Laham, C. Y. Peng, A. Nanayakkara, M. Challacombe, P. M. W. Gill, B. Johnson, W. Chen, M. W. Wong, C. Gonzalez, J. A. Pople, Gaussian, Inc., Pittsburgh PA, 2003.
